# Supplementary material for: Giant magnetic anisotropy of a two-dimensional metal–dicyanoanthracene framework
Source: Royal Society of Chemistry journal article supplement (doi:10.1039/c8nr03442g), 2018-01-01
Supplement: c8nr03442g1.pdf [file c8nr03442g1.pdf]

## Supplementary Materials for Giant magnetic anisotropy of two-dimensional metal–dicyanoanthracene framework

Yun Zhang<sup>1,2,3</sup>, Zhao Wei<sup>1</sup>, Meiguang Zhang<sup>1</sup>, Xiao Gu<sup>2, 4\*</sup>, Li Huang<sup>3\*</sup>

<sup>1</sup>*Department of Physics and Information Technology, Baoji University of Arts and Sciences, Baoji 721016, China*

<sup>2</sup>*Department of Applied Physics, Chongqing University, Chongqing 400044, P.R. China*

<sup>3</sup>*Department of Physics, Southern University of Science and Technology, Shenzhen, Guangdong 518055, China*

<sup>4</sup>*Faculty of Science, Ningbo University, Ningbo-315211, P.R. China*

### Supplementary computational methods

Table S1. Effective  $U$  value ( $U_{\text{eff}}$ ) versus the calculated MAE (in meV) of Ir-DCA.

| $U_{\text{eff}}$ (eV) | 0   | 0.5    | 1.0    | 1.5    | 2.0  | SCAN |
|-----------------------|-----|--------|--------|--------|------|------|
| MAE(meV)              | 180 | 188.36 | 119.56 | 24.319 | 18.4 | 259  |

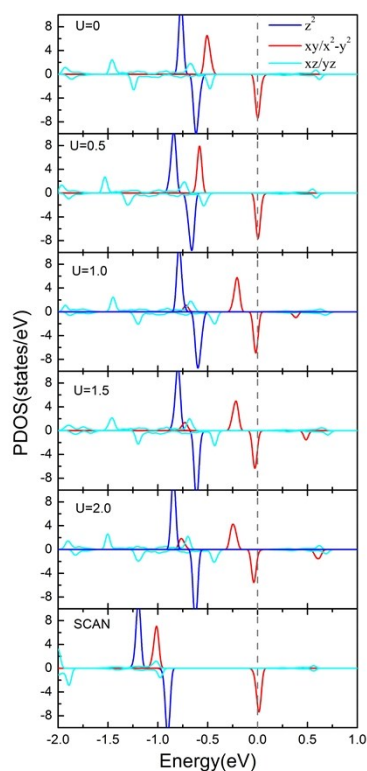

Fig. S1. Projected density of states (PDOS) of Ir-DCA

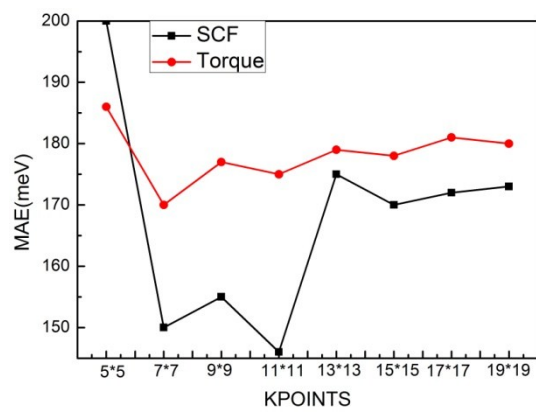

Fig. S2. K points convergences for torque and direct method, respectively.
